# Supplementary material
Source: Springer Nature journal article supplement (https://www.springermedizin.de/resource/supplementary/12913_2006_384_MOESM2_ESM.pdf/9535072)
Supplement: MOESM2 [file 9535072]

Private Insurance company

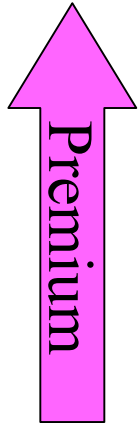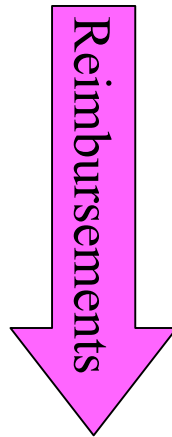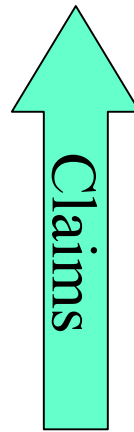

SEWA – the NGO

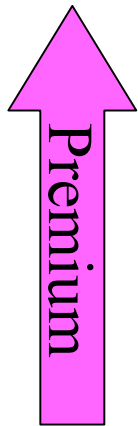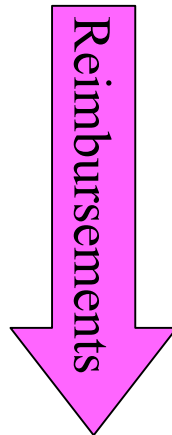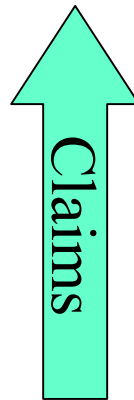

Private and  
Public  
Hospitals

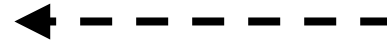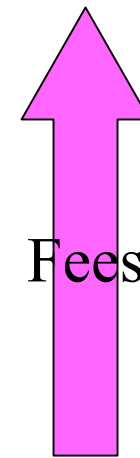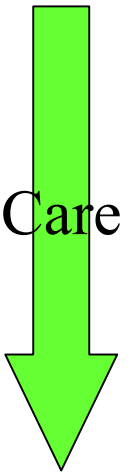

**Members of the Self Employed Women's Association  
(SEWA)**
